# Supplementary material
Source: PubMed Central journal article supplement (PMC4026300)
Supplement: Supp_Data.pdf [file Supp_Data.pdf]

## Supplementary Data

### Supplementary Materials and Methods

#### *Quantification of delivered siRNAs*

After transfection, cells were washed in three times with phosphate buffered saline and total RNA was extracted using an Iso-RNA Lysis reagent according to manufacturer's instructions. Ten nanograms of total RNA was processed to Custom TaqMan Small RNA Assays (Applied Biosystems, Foster City, CA, USA). According to the manufacturer's protocol, reverse transcription targeting si-GAPDH-2 was performed using the custom synthesized stem-loop RT primer specific to the siGAPDH-2 antisense strand and TaqMan MicroRNA Reverse Transcription Kit (Applied Biosystems). For quantitative PCR, TaqMan

Small RNA Assay primers set specific to the siGAPDH-2 antisense strand and TaqMan Universal PCR Master Mix II, No UNG (Applied Biosystems) was used. Real-time PCR experiments were done with an StepOne Real-Time PCR System (Applied Biosystems).

#### *Fluorescence microscopy analysis*

Cells grown on glass bottom petri dishes were transfected with siGAPDH-2 labeled with Cy3 at the 3' end of antisense strand (50 nM final) for 4 hours. Following 2 quick washes, images were acquired using fluorescence microscope (Olympus IX-81) and Metaview imaging software at  $\times 400$  magnification.

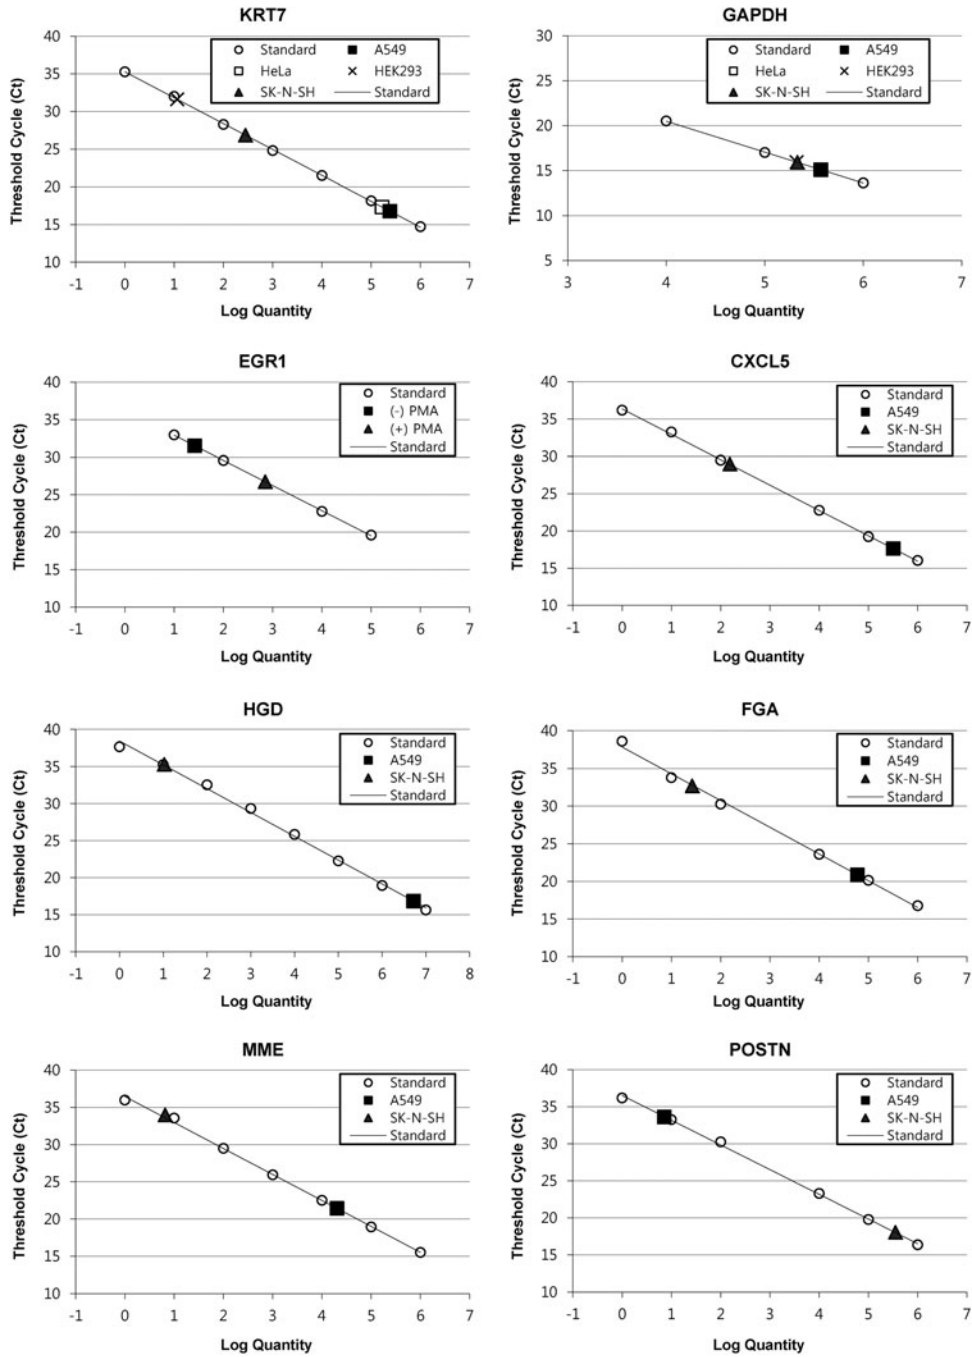

**SUPPLEMENTARY FIG. S1.** Standard curve plots for the analyzed genes in this study. The standard curve was generated by plotting the cycle threshold ( $C_T$ ) values obtained against the logarithm of a known quantity of polymerase chain reaction (PCR) targets. Data from each condition [cell lines or phorbol-12-myristate-13-acetate (PMA) non-induction/induction] are also presented and results show that  $C_T$  values are positioned within linear range of the standard curve.

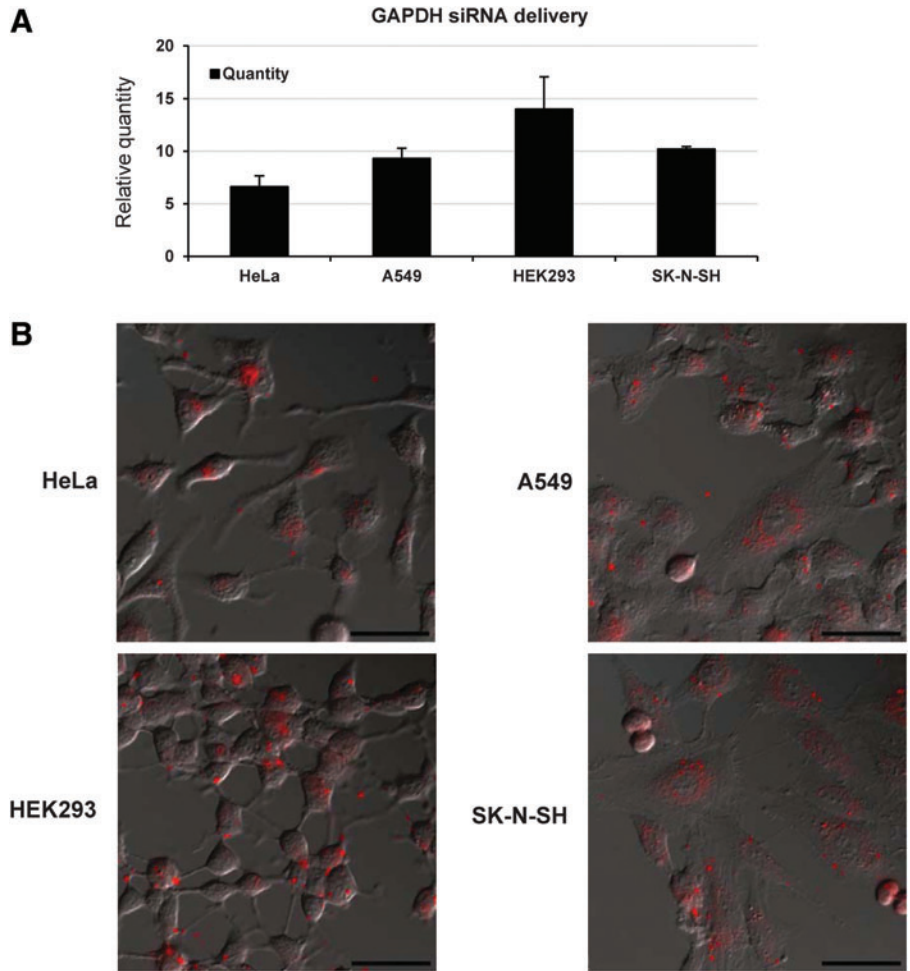

**SUPPLEMENTARY FIG. S2.** Analysis of small interfering RNS (siRNA) cellular delivery in four cell lines. **(A)** Quantification of the delivered siRNA. siGAPDH-2 was transfected into each cell lines (10 nM final) for 6 hours and delivered siRNA was quantified through the TaqMan quantitative reverse transcription–polymerase chain reaction (qRT-PCR) assays. Data in the graph represent mean  $\pm$  SD values of three independent experiments. **(B)** Fluorescence visualization of delivered siRNA. Cells were transfected with 3'-Cy3-labeled siGAPDH-2 (50 nM final) for 4 hours. Images were acquired at  $\times 400$  magnification, and overlay of DIC and Cy3 fluorescence images is presented. The scale bar represents 50  $\mu$ m.

SUPPLEMENTARY TABLE S1. SMALL INTERFERING RNA INFORMATION

| <i>Gene name</i>   | <i>Accession number</i> | <i>siRNA target site</i> | <i>RNA oligo name</i> | <i>Sequence</i>                 |
|--------------------|-------------------------|--------------------------|-----------------------|---------------------------------|
| <i>KRT7</i>        | NM_005556               | 645–663                  | siKRT7-1 sense        | 5'-UGGAGGACUUCAAGAAUAA(dTdT)-3' |
|                    |                         |                          | siKRT7-1 antisense    | 5'-UUAUUCUUGAAGUCCUCCA(dTdT)-3' |
| <i>KRT7</i>        |                         | 927–945                  | siKRT72 sense         | 5'-AGUAUGAGGAGAUGGCCAA(dTdT)-3' |
|                    |                         |                          | siKRT7-2              | 5'-UUGGCAUCUCCUCAUACU(dTdT)-3'  |
| <i>GAPDH</i>       | NM_002046               | 660–678                  | siGAPDH-1 sense       | 5'-GGUCAUCCAUGACAACUUU(dTdT)-3' |
|                    |                         |                          | siGAPDH-1 antisense   | 5'-AAAGUUGUCAUGGAUGACC(dTdT)-3' |
| <i>GAPDH</i>       |                         | 316–334                  | siGAPDH-2 sense       | 5'-CAAUAUGAUUCCACCCAUG(dTdT)-3' |
|                    |                         |                          | siGAPDH-2 sense       | 5'-CAAUAUGAUUCCACCCAUG(dTdT)-3' |
| <i>EGR1</i>        | NM_001964               | 1536–1554                | siEGR1 sense          | 5'-GGACAAGAAAGCAGACAAA(dTdT)-3' |
|                    |                         |                          | siEGR1 antisense      | 5'-UUUGUCUGCUUUCUUGUCC(dTdT)-3' |
| <i>CXCL5</i>       | NM_002994               | 398–416                  | siCXCL5 sense         | 5'-CUGAAGAACGGGAAGGAAA(dTdT)-3' |
|                    |                         |                          | siCXCL5 antisense     | 5'-UUUCCUCCCGUUCUUCAG(dTdT)-3'  |
| <i>HGD</i>         | NM_000187               | 817–835                  | siHGD sense           | 5'-GUGUGGAGCUGGAGACAU(dTdT)-3'  |
|                    |                         |                          | siHGD antisense       | 5'-UAUGUCUCCAGCUCACAC(dTdT)-3'  |
| <i>FGA</i>         | NM_021871               | 676–694                  | siFGA sense           | 5'-GGUCAUUGCCAAAGACUUA(dTdT)-3' |
|                    |                         |                          | siFGA antisense       | 5'-UAAGUCUUUGGCAAUGACC(dTdT)-3' |
| <i>MME</i>         | NM_000902               | 1530–1548                | siMME sense           | 5'-AGAAAAGGCCUUAGCAAUU(dTdT)-3' |
|                    |                         |                          | siMME antisense       | 5'-AAUUGCUAAGGCCUUUUCU(dTdT)-3' |
| <i>POSTN</i>       | NM_006475               | 486–504                  | siPOSTN sense         | 5'-GGGAGGAGATCGAGGGAAA(dTdT)-3' |
|                    |                         |                          | siPOSTN antisense     | 5'-UUUCCCUCGTUCUCCUCCC(dTdT)-3' |
| <i>Luciferase*</i> | pTRE3G-Luc              | 1885–1903                | siLuc sense           | 5'-UUGUUUUGGAGCACGGAAA(dTdT)-3' |
|                    |                         |                          | siLuc antisense       | 5'-UUUCCGUGCUCCAAAACAA(dTdT)-3' |

\*For Luciferase targeting small interfering (siRNA), target site is based on the pTRE3G-Luc (Clontech) vector used in this study.

SUPPLEMENTARY TABLE S2. PRIMER INFORMATION

| <i>Gene</i>   | <i>Name</i>    | <i>Primer name</i>            | <i>Sequence</i> |
|---------------|----------------|-------------------------------|-----------------|
| <i>GAPDH</i>  | GAPDH-forward  | 5'-GAGTCAACGGATTTGGTCGT-3'    | 184             |
|               | GAPDH-reverse  | 5'-GACAAGCTTCCCGTTCTCAG-3'    |                 |
| <i>KRT7</i>   | KRT7-forward   | 5'-GAGCCGGTTGGCTGGAGATGGAG-3' | 123             |
|               | KRT7-reverse   | 5'-CAGGGCATTGCTGCCCATGGTTC-3' |                 |
| <i>EGR1</i>   | EGR1-forward   | 5'-ACCTGACCGCAGAGTCTTTTC-3'   | 109             |
|               | EGR1-reverse   | 5'-GCCAGTATAGGTGATGGGGG-3'    |                 |
| <i>CXCL5</i>  | CXCL5-forward  | 5'-CCACTATGAGCCTCCTGTCC-3'    | 185             |
|               | CXCL5-reverse  | 5'-TGGGATGAACTCCTTGCGTG-3'    |                 |
| <i>HGD</i>    | HGD-forward    | 5'-GACGAAGGCCAAGTCACTCA-3'    | 127             |
|               | HGD-reverse    | 5'-AAGGTATGCAGGCCACTCAC-3'    |                 |
| <i>FGA</i>    | FGA-forward    | 5'-ACGCGTCGTTTCATGCTCTAA-3'   | 188             |
|               | FGA-reverse    | 5'-GAAGGCAGCTTCATCAGGGT-3'    |                 |
| <i>MME</i>    | MME-forward    | 5'-ATCAAGTTTGGGTCTGTGCTG-3'   | 102             |
|               | MME-reverse    | 5'-TCCAGCTGTGGCAACAAGAAT-3'   |                 |
| <i>POSTN</i>  | POSTN-forward  | 5'-TGAAAACCATCGGAGGCAA-3'     | 109             |
|               | POSTN-reverse  | 5'-AATCGCACCGTTTCTCCCTT-3'    |                 |
| <i>TUBA1A</i> | TUBA1A-forward | 5'-GACCAAGCGTACCATCCAGT-3'    | 199             |
|               | TUBA1A-reverse | 5'-CACGTTTGGCATAACATCAGG-3'   |                 |
